# Supplementary material for: Impact of chemical composition of ecotoxicological test media on the stability and aggregation status of silver nanoparticles
Source: Royal Society of Chemistry journal article supplement (doi:10.1039/c5en00152h), 2016-01-01
Supplement: c5en00152h1.pdf [file c5en00152h1.pdf]

## Supporting Information

### Impact of chemical composition of ecotoxicological test media on the stability and aggregation status of silver nanoparticles

*George Metreveli<sup>†</sup>, Bianca Frombold<sup>†</sup>, Frank Seitz<sup>‡</sup>, Alexandra Grün<sup>§</sup>, Allan Philippe<sup>†</sup>, Ricki  
R. Rosenfeldt<sup>‡</sup>, Mirco Bundschuh<sup>‡, #</sup>, Ralf Schulz<sup>‡</sup>, Werner Manz<sup>§</sup>, and Gabriele E.  
Schaumann<sup>\*, †</sup>*

<sup>†</sup>Group of Environmental and Soil Chemistry, Institute for Environmental Sciences,  
University of Koblenz-Landau, Fortstr. 7, D-76829 Landau, Germany

<sup>‡</sup>Group of Ecotoxicology and Environment, Institute for Environmental Sciences, University  
of Koblenz-Landau, Fortstr. 7, D-76829 Landau, Germany

<sup>§</sup> Department of Biology, Institute for Integrated Natural Sciences, University of Koblenz-  
Landau, Universitätsstr. 1, D-56070 Koblenz, Germany

<sup>#</sup>Department of Aquatic Sciences and Assessment, Swedish University of Agricultural  
Sciences, Lennart Hjelm's väg 9, SWE-75007 Uppsala, Sweden

Pages: 15

Tables: 12

Figures: 7

## Silver Nanoparticle Synthesis

1290.3 mg (5 mmol) trisodium citrate  $\text{Na}_3\text{C}_6\text{H}_5\text{O}_7$  (Sigma-Aldrich) and 169.9 mg (1 mmol) silver nitrate  $\text{AgNO}_3$  ( $\text{AgNO}_3$ ,  $\geq 99.9\%$ , p.a., Carl Roth) were dissolved in 950 mL and 50 mL deionised water respectively. The pH values of 11 and 6 were adjusted in trisodium citrate solution using 1 mol  $\text{L}^{-1}$  NaOH solution (NaOH, 1 N standard solution, Carl Roth) and 1 mmol  $\text{L}^{-1}$   $\text{HNO}_3$  solution (sub-boiled) for the synthesis of 30 nm and 100 nm Ag-NPs respectively. After pH adjustment, the solution of trisodium citrate was brought to a boil in a 2000 mL beaker glass covered with watch-glass under magnetic stirring using laboratory hotplate magnetic stirrer (RCT basic, IKA Labortechnik). After start of boiling, the solution of silver nitrate was added to the solution of trisodium citrate drop by drop within 5 min. The colour of the reaction solution changed from colourless to yellow and then to turbid grey. The boiling and stirring was continued until no more changes in the colour were observed, for 20 min (30 nm Ag-NPs) and for 2 h (100 nm Ag-NPs). Thereafter, the samples were removed from laboratory hotplate magnetic stirrer and cooled to room temperature. To compensate the water losses through evaporation, the samples were filled up to 1 L in a 1 L volumetric glass flask with deionised water. The samples showed the final pH values of 8.9 (30 nm Ag-NPs) and 6.1 (100 nm Ag-NPs). The synthesised silver nanoparticle dispersions were stored in the dark at 4°C.

## Preparation of SRHA Stock Solution

The SRHA stock solution (200 mg  $\text{L}^{-1}$ ) was prepared by dissolving 10 mg SRHA in 50 mL deionized water. The solution pH was adjusted to 10 using 1 mol  $\text{L}^{-1}$  NaOH. The solution was then filtrated through 0.1  $\mu\text{m}$  cellulose nitrate membrane filter (Whatman) and stirred with magnetic stirrer for 24 h. The prepared SRHA stock solution was stored in dark at 4-6°C in

refrigerator. The total organic carbon (TOC) concentration of SRHA stock solution was  $94.1 \pm 2.8 \text{ mg L}^{-1}$ . The TOC concentration was determined by TOC analyser (analytikjena multi N/C 2100, Analytik Jena AG).

### Calculation of Centrifugation Duration

Centrifugation duration ( $t$ , h) for ultracentrifuge was calculated using following equation:

$$t = \frac{K}{S_{20,W}}, \quad (1)$$

where  $K$  is the clearing factor for the rotor, and  $S_{20,W}$  (S) is the sedimentation coefficient of particles in water at 20°C.  $K$  was calculated from maximum ( $r_{max}$ ) and minimum ( $r_{min}$ ) rotor radii (m) and rotor speed ( $\nu$ , rpm) using following equation:

$$K = \frac{253000 \ln \frac{r_{max}}{r_{min}}}{\left( \frac{\nu}{1000} \right)^2}. \quad (2)$$

For calculation of  $S_{20,W}$  following equation was applied:

$$S_{20,W} = \frac{2r_p^2(\rho_p - \rho_M)10^{13}}{9\eta}, \quad (3)$$

where  $r_p$  (m) is the particle radius,  $\rho_p$  ( $\text{kg m}^{-3}$ ) is the particle density,  $\rho_M$  ( $\text{kg m}^{-3}$ ) is the medium density, and  $\eta$  ( $\text{kg m}^{-1} \text{ s}^{-1}$ ) is the dynamic viscosity of medium.

**Table S1.** Chemical composition of ASTM medium.

| Component                                | Manufacturer  | Purity  | Concentration in<br>mg L <sup>-1</sup> |
|------------------------------------------|---------------|---------|----------------------------------------|
| NaHCO <sub>3</sub>                       | Carl Roth     | ≥ 99.5% | 192                                    |
| CaSO <sub>4</sub> ·2H <sub>2</sub> O     | Carl Roth     | ≥ 98.0% | 120                                    |
| MgSO <sub>4</sub>                        | Carl Roth     | ≥ 99.0% | 120                                    |
| KCl                                      | Carl Roth     | ≥ 99.5% | 8                                      |
| Na <sub>2</sub> SeO <sub>3</sub>         | Sigma-Aldrich | ≥ 95.0% | 0.00219                                |
| Thiamine hydrochloride (B <sub>1</sub> ) | Sigma-Aldrich | ≥ 99.0% | 0.075                                  |
| Biotin (B <sub>7</sub> )                 | Carl Roth     | ≥ 98.5% | 0.00075                                |
| Cyanocobalamine (B <sub>12</sub> )       | Carl Roth     | ≥ 96.0% | 0.001                                  |
| Ionic strength                           |               |         | 9.25 mmol L <sup>-1</sup>              |
| pH                                       |               |         | 8.2                                    |

**Table S2.** Chemical composition of SAM-5S medium.

| Component                            | Manufacturer | Purity  | Concentration in<br>mg L <sup>-1</sup> |
|--------------------------------------|--------------|---------|----------------------------------------|
| NaHCO <sub>3</sub>                   | Carl Roth    | ≥ 99.5% | 85.5                                   |
| CaCl <sub>2</sub> ·2H <sub>2</sub> O | Carl Roth    | ≥ 99.0% | 147                                    |
| MgSO <sub>4</sub> ·7H <sub>2</sub> O | Carl Roth    | ≥ 99.0% | 61.5                                   |
| KCl                                  | Carl Roth    | ≥ 99.5% | 3.8                                    |
| NaBr                                 | Carl Roth    | ≥ 99.0% | 1.03                                   |
| Ionic strength                       |              |         | 5.06 mmol L <sup>-1</sup>              |
| pH                                   |              |         | 7.8                                    |

**Table S3.** Chemical composition of R2A medium (autoclaved for 20 min at 121°C).

| Component                                                         | Manufacturer  | Purity  | Concentration in<br>mg L <sup>-1</sup> |
|-------------------------------------------------------------------|---------------|---------|----------------------------------------|
| MgSO <sub>4</sub> ·7H <sub>2</sub> O                              | AppliChem     | ≥ 99.5% | 50                                     |
| K <sub>2</sub> HPO <sub>4</sub>                                   | Sigma-Aldrich | ≥ 98.0% | 300                                    |
| Na-Pyruvat                                                        | AppliChem     | ≥ 99.5% | 300                                    |
| Casein acid hydrolysate<br>(bacteriological, for<br>biochemistry) | Carl Roth     | -       | 500                                    |
| Yeast extract<br>(powdered, for bacteriology)                     | Carl Roth     | -       | 500                                    |
| Proteose peptone<br>(for microbiology)                            | Carl Roth     | -       | 500                                    |
| Glucose<br>(α-D(+)) Glucose monohydrate<br>for microbiology)      | Carl Roth     | -       | 500                                    |
| Tween-80 (pure, Ph. Eur.)                                         | AppliChem     | -       | 1 mL                                   |
| Ionic strength                                                    |               |         | 8.75 mmol L <sup>-1</sup>              |
| pH                                                                |               |         | 6.7                                    |

**Table S4.** Chemical composition of TM. Concentrations of cations and anions and ionic strength are given in mmol L<sup>-1</sup>. Concentrations of organic compounds are presented in mg L<sup>-1</sup>.

|                                                                            | ASTM       | SAM-5S | R2A   |
|----------------------------------------------------------------------------|------------|--------|-------|
| Cations                                                                    |            |        |       |
| Na <sup>+</sup>                                                            | 2.33       | 1.01   | 2.7   |
| K <sup>+</sup>                                                             | 0.107      | 0.05   | 3.5   |
| Total monovalent cations (Na <sup>+</sup> + K <sup>+</sup> )               | 2.437      | 1.06   | 6.2   |
| Ca <sup>2+</sup>                                                           | 0.694      | 1      | -     |
| Mg <sup>2+</sup>                                                           | 1          | 0.25   | 0.203 |
| Total divalent cations (Ca <sup>2+</sup> + Mg <sup>2+</sup> ) <sup>a</sup> | 1.694      | 1.25   | 0.203 |
| Anions                                                                     |            |        |       |
| SO <sub>4</sub> <sup>2-</sup>                                              | 1.694      | 0.25   | 0.203 |
| HCO <sub>3</sub> <sup>-</sup>                                              | 2.285      | 1.018  | 0     |
| Cl <sup>-</sup>                                                            | 0.107      | 2.051  | 0     |
| Br <sup>-</sup>                                                            | 0          | 0.01   | 0     |
| SeO <sub>3</sub> <sup>2-</sup>                                             | 0.00001266 | 0      | 0     |
| HPO <sub>4</sub> <sup>2-</sup>                                             | 0          | 0      | 1.722 |
| Ionic strength                                                             | 9.25       | 5.06   | 8.75  |
| pH                                                                         | 8.2        | 7.8    | 6.7   |
| Organic compounds                                                          |            |        |       |
| Thiamine hydrochloride (B <sub>1</sub> )                                   | 0.075      | -      | -     |
| Biotin (B <sub>7</sub> )                                                   | 0.00075    | -      | -     |
| Cyanocobalamine (B <sub>12</sub> )                                         | 0.001      | -      | -     |
| Na-Pyruvat                                                                 | -          | -      | 300   |
| Casein acid hydrolysate                                                    | -          | -      | 500   |
| Yeast extract                                                              | -          | -      | 500   |
| Proteose peptone                                                           | -          | -      | 500   |
| Glucose                                                                    | -          | -      | 500   |
| Tween-80                                                                   | -          | -      | 1 mL  |

<sup>a</sup> only Mg<sup>2+</sup> for R2A medium

**Table S5.** pH values in ATM after addition of NOM and Ag-NP.

| Medium | Long term agglomeration experiments | Early stage agglomeration experiments |
|--------|-------------------------------------|---------------------------------------|
| ASTM   | 8.1-8.4                             | 8.0-8.4                               |
| SAM-5S | 7.8-7.9                             | 7.7-8.1                               |
| R2A    | 6.8                                 | 6.7-6.9                               |

**Table S6.** Stock solutions for the preparation of ASTM medium for early stage agglomeration kinetics experiments

| Stock solutions | Component                                | Concentration in mg L <sup>-1</sup> |
|-----------------|------------------------------------------|-------------------------------------|
| Stock-1         | CaSO <sub>4</sub> ·2H <sub>2</sub> O     | 1721.4                              |
| Stock-2         | MgSO <sub>4</sub>                        | 12037                               |
| Stock-3         | NaHCO <sub>3</sub>                       | 9600                                |
|                 | KCl                                      | 400                                 |
|                 | Na <sub>2</sub> SeO <sub>3</sub>         | 0.1095 <sup>a</sup>                 |
|                 | Thiamine hydrochloride (B <sub>1</sub> ) | 75                                  |
| Stock-4         | Biotin (B <sub>7</sub> )                 | 0.75                                |
|                 | Cyanocobalamine (B <sub>12</sub> )       | 1                                   |

<sup>a</sup> To adjust this concentration in the stock solution 3, a stock solution of Na<sub>2</sub>SeO<sub>3</sub> with a concentration of 109.5 mg L<sup>-1</sup> was prepared

**Table S7.** Stock solutions for the preparation of SAM-5S medium for early stage agglomeration kinetics experiments

| Stock solutions | Component                            | Concentration in mg L <sup>-1</sup> |
|-----------------|--------------------------------------|-------------------------------------|
| Stock-1         | CaCl <sub>2</sub> ·2H <sub>2</sub> O | 1470.1                              |
| Stock-2         | MgSO <sub>4</sub> ·7H <sub>2</sub> O | 24648                               |
| Stock-3         | NaHCO <sub>3</sub>                   | 4275                                |
|                 | KCl                                  | 190                                 |
|                 | NaBr                                 | 51.5                                |

**Table S8.** Stock solutions for the preparation of R2A medium for early stage agglomeration kinetics experiments

| Stock solutions | Component                                                                    | Concentration in<br>mg L <sup>-1</sup> |
|-----------------|------------------------------------------------------------------------------|----------------------------------------|
| Stock-1         | MgSO <sub>4</sub> ·7H <sub>2</sub> O                                         | 123240                                 |
| Stock-2         | R2A medium without MgSO <sub>4</sub> (for chemical composition see Table S3) |                                        |

**Table S9.** Input concentration of ions (μmol L<sup>-1</sup>) and pH values used in the model calculations. In “ASTM with CaCl<sub>2</sub>” and “ASTM with CaBr<sub>2</sub>” medium the concentration of MgSO<sub>4</sub> was set to 0 mmol L<sup>-1</sup> and CaSO<sub>4</sub> was substituted by an equivalent amount (0.7 mmol L<sup>-1</sup>) of CaCl<sub>2</sub> or CaBr<sub>2</sub> respectively.

|                                | ASTM                 | SAM-5S             | R2A                   | ASTM with<br>CaCl <sub>2</sub> | ASTM with<br>CaBr <sub>2</sub> |
|--------------------------------|----------------------|--------------------|-----------------------|--------------------------------|--------------------------------|
| Ag <sup>+</sup>                | 0.983 <sup>a</sup>   | 0.102 <sup>a</sup> | 0.037 <sup>a</sup>    | 0.983 <sup>a</sup>             | 0.983 <sup>a</sup>             |
| Mg <sup>2+</sup>               | 997 <sup>b</sup>     | 250 <sup>b</sup>   | 220 <sup>d</sup>      | 0                              | 0                              |
| Ca <sup>2+</sup>               | 697 <sup>b</sup>     | 1000 <sup>b</sup>  | 9 <sup>c</sup>        | 697 <sup>b</sup>               | 697 <sup>b</sup>               |
| Na <sup>+</sup>                | 2285 <sup>b</sup>    | 1028 <sup>b</sup>  | 5740 <sup>c</sup>     | 2285 <sup>b</sup>              | 2285 <sup>b</sup>              |
| K <sup>+</sup>                 | 107 <sup>b</sup>     | 51 <sup>b</sup>    | 4364 <sup>d</sup>     | 107 <sup>b</sup>               | 107 <sup>b</sup>               |
| SO <sub>4</sub> <sup>2-</sup>  | 1694 <sup>b</sup>    | 250 <sup>b</sup>   | 203 <sup>b</sup>      | 0                              | 0                              |
| HCO <sub>3</sub> <sup>-</sup>  | 2285 <sup>b</sup>    | 1018 <sup>b</sup>  | 0 <sup>b</sup>        | 2285 <sup>b</sup>              | 2285 <sup>b</sup>              |
| Cl <sup>-</sup>                | 107 <sup>b</sup>     | 2051 <sup>b</sup>  | 0 <sup>b</sup>        | 1501                           | 107 <sup>b</sup>               |
| Br <sup>-</sup>                | 0                    | 10 <sup>b</sup>    | 0 <sup>b</sup>        | 0                              | 1394                           |
| NO <sub>3</sub> <sup>-</sup>   | 0.983 <sup>e</sup>   | 0.102 <sup>e</sup> | 6712.037 <sup>e</sup> | 0.983 <sup>e</sup>             | 0.983 <sup>e</sup>             |
| SeO <sub>3</sub> <sup>2-</sup> | 0.01266 <sup>b</sup> | 0 <sup>b</sup>     | 0 <sup>b</sup>        | 0.01266 <sup>b</sup>           | 0.01266 <sup>b</sup>           |
| HPO <sub>4</sub> <sup>2-</sup> | 0 <sup>b</sup>       | 0 <sup>b</sup>     | 1722 <sup>b</sup>     | 0                              | 0                              |
| pH                             | 8.2 <sup>b</sup>     | 7.8 <sup>b</sup>   | 6.7 <sup>b</sup>      | 8.2 <sup>b</sup>               | 8.2 <sup>b</sup>               |

<sup>a</sup> From Ag<sup>+</sup> release experiments with 1 d shaking duration. <sup>b</sup> From theoretical medium composition. <sup>c</sup> From ion composition determined in organic compounds. <sup>d</sup> From theoretical medium composition and ion composition determined in organic compounds. <sup>e</sup> Added for charge balance between cations and anions. Concentration of HCO<sub>3</sub><sup>-</sup>, CO<sub>3</sub><sup>2-</sup>, and CO<sub>2</sub> was additionally calculated from the CO<sub>2</sub> equilibrium between air and aqueous phase.

**Table S10.** Speciation of silver (in % of total  $\text{Ag}^+$  species concentration) in TM. In “ASTM with  $\text{CaCl}_2$ ” and “ASTM with  $\text{CaBr}_2$ ” medium the concentration of  $\text{MgSO}_4$  was set to 0 mmol  $\text{L}^{-1}$  and  $\text{CaSO}_4$  was substituted by an equivalent amount (0.7 mmol  $\text{L}^{-1}$ ) of  $\text{CaCl}_2$  or  $\text{CaBr}_2$  respectively. As a total concentration of  $\text{Ag}^+$  the concentration of  $\text{Ag}_{<2\text{nm}}$  detected after 1 d shaking in  $\text{Ag}^+$  release experiments was used. Calculations were performed based on the assumption that the ultracentrifugated samples (< 2 nm) solely contain  $\text{Ag}^+$  species. The values in parentheses are saturation indexes for  $\text{AgCl(s)}$  and  $\text{AgBr(s)}$ .

| Species                    | ASTM       | SAM-5S     | R2A    | ASTM with $\text{CaCl}_2$ | ASTM with $\text{CaBr}_2$ |
|----------------------------|------------|------------|--------|---------------------------|---------------------------|
| $\text{Ag}^+$              | 82.12      | 16.71      | 99.40  | 8.82                      | 0.02                      |
| $\text{AgCl(aq)}$          | 16.10      | 65.43      | 0      | 25.59                     | < 0.01                    |
| $\text{AgCl}_2^-$          | 0.15       | 11.99      | 0      | 3.43                      | < 0.01                    |
| $\text{AgCl}_3^{2-}$       | < 0.01     | 0.03       | 0      | 0.01                      | < 0.01                    |
| $\text{AgBr(aq)}$          | 0          | 5.74       | 0      | 0                         | 1.13                      |
| $\text{AgBr}_2^-$          | 0          | 0.05       | 0      | 0                         | 1.26                      |
| $\text{AgBr}_3^{2-}$       | 0          | < 0.01     | 0      | 0                         | 0.01                      |
| $\text{AgBr}_4^{3-}$       | 0          | < 0.01     | 0      | 0                         | < 0.01                    |
| $\text{AgNO}_3(\text{aq})$ | < 0.01     | < 0.01     | 0.36   | < 0.01                    | < 0.01                    |
| $\text{AgSO}_4^-$          | 1.61       | 0.05       | 0.24   | 0                         | 0                         |
| $\text{AgOH(aq)}$          | 0.01       | < 0.01     | < 0.01 | < 0.01                    | < 0.01                    |
| $\text{Ag(OH)}_2^-$        | < 0.01     | < 0.01     | < 0.01 | < 0.01                    | < 0.01                    |
| $\text{AgSeO}_3^-$         | < 0.01     | 0          | 0      | < 0.01                    | < 0.01                    |
| $\text{Ag(SeO}_3)_2^{3-}$  | < 0.01     | 0          | 0      | < 0.01                    | < 0.01                    |
| $\text{AgCl(s)}$           | 0 (-0.201) | 0 (-0.576) | 0      | 62.15 (0)                 | 0 (-3.723)                |
| $\text{AgBr(s)}$           | 0          | 0 (-0.279) | 0      | 0                         | 97.57 (0)                 |

**Table S11.** Equilibrium concentration of  $\text{Ag}^+$  ions ( $\mu\text{g L}^{-1}$ ) calculated for equilibrium state between  $\text{Ag}^+$  and  $\text{AgCl(s)}$  or  $\text{AgBr(s)}$ . Calculations were done for  $\text{Cl}^-$  and  $\text{Br}^-$  concentrations used in ASTM and SAM-5S.

| Species          | ASTM | SAM-5S |
|------------------|------|--------|
| $\text{AgCl(s)}$ | 169  | 41     |
| $\text{AgBr(s)}$ | -    | 21     |

**Table S12.** Metal concentrations ( $\mu\text{mol L}^{-1}$ , mean value  $\pm$  standard deviation from three replicate measurements) in organic compounds used for preparation of R2A medium.

| Sample treatment   | Organic compounds       | Ca              | Mg               | Na                  | K                 | Ca + Mg | Na + K  |
|--------------------|-------------------------|-----------------|------------------|---------------------|-------------------|---------|---------|
| Unfiltered         | Na-Pyruvat              | 0.19 $\pm$ 0.01 | 0.04 $\pm$ 0.01  | 2267.74 $\pm$ 6.78  | < LQ <sup>a</sup> | 0.23    | 2267.74 |
|                    | Casein acid hydrolysate | 2.90 $\pm$ 0.02 | 1.16 $\pm$ 0.01  | 3114.71 $\pm$ 9.17  | 2.20 $\pm$ 0.02   | 4.06    | 3116.91 |
|                    | Yeast extract           | 2.79 $\pm$ 0.02 | 13.84 $\pm$ 0.02 | 22.94 $\pm$ 0.09    | 757.07 $\pm$ 1.25 | 16.63   | 780.01  |
|                    | Proteose peptone        | 3.05 $\pm$ 0.01 | 9.69 $\pm$ 0.03  | 304.27 $\pm$ 0.75   | 399.05 $\pm$ 1.95 | 12.74   | 703.32  |
|                    | Glucose                 | 0.16 $\pm$ 0.01 | 0.01 $\pm$ 0.01  | 0.32 $\pm$ 0.01     | < LQ <sup>a</sup> | 0.17    | 0.32    |
|                    | Tween-80                | 0.10 $\pm$ 0.01 | 0.03 $\pm$ 0.01  | 13.09 $\pm$ 0.23    | 1.54 $\pm$ 0.05   | 0.13    | 14.63   |
|                    | Sum                     | 9.19            | 24.77            | 5723.07             | 1159.86           | 33.96   | 6882.93 |
| Filtered (< 3 kDa) | Na-Pyruvat              | 1.04 $\pm$ 0.01 | 0.21 $\pm$ 0.01  | 2301.33 $\pm$ 3.19  | < LQ <sup>a</sup> | 1.25    | 2301.33 |
|                    | Casein acid hydrolysate | 3.89 $\pm$ 0.01 | 1.32 $\pm$ 0.01  | 3161.96 $\pm$ 21.69 | 2.15 $\pm$ 0.01   | 5.21    | 3164.11 |
|                    | Yeast extract           | 2.65 $\pm$ 0.01 | 10.93 $\pm$ 0.02 | 22.52 $\pm$ 0.02    | 575.88 $\pm$ 1.91 | 13.58   | 598.40  |
|                    | Proteose peptone        | 1.55 $\pm$ 0.01 | 4.08 $\pm$ 0.02  | 250.22 $\pm$ 0.67   | 344.25 $\pm$ 2.96 | 5.63    | 594.47  |
|                    | Sum                     | 9.13            | 16.54            | 5736.03             | 922.28            | 25.67   | 6658.31 |

<sup>a</sup> LQ: Limit of quantification

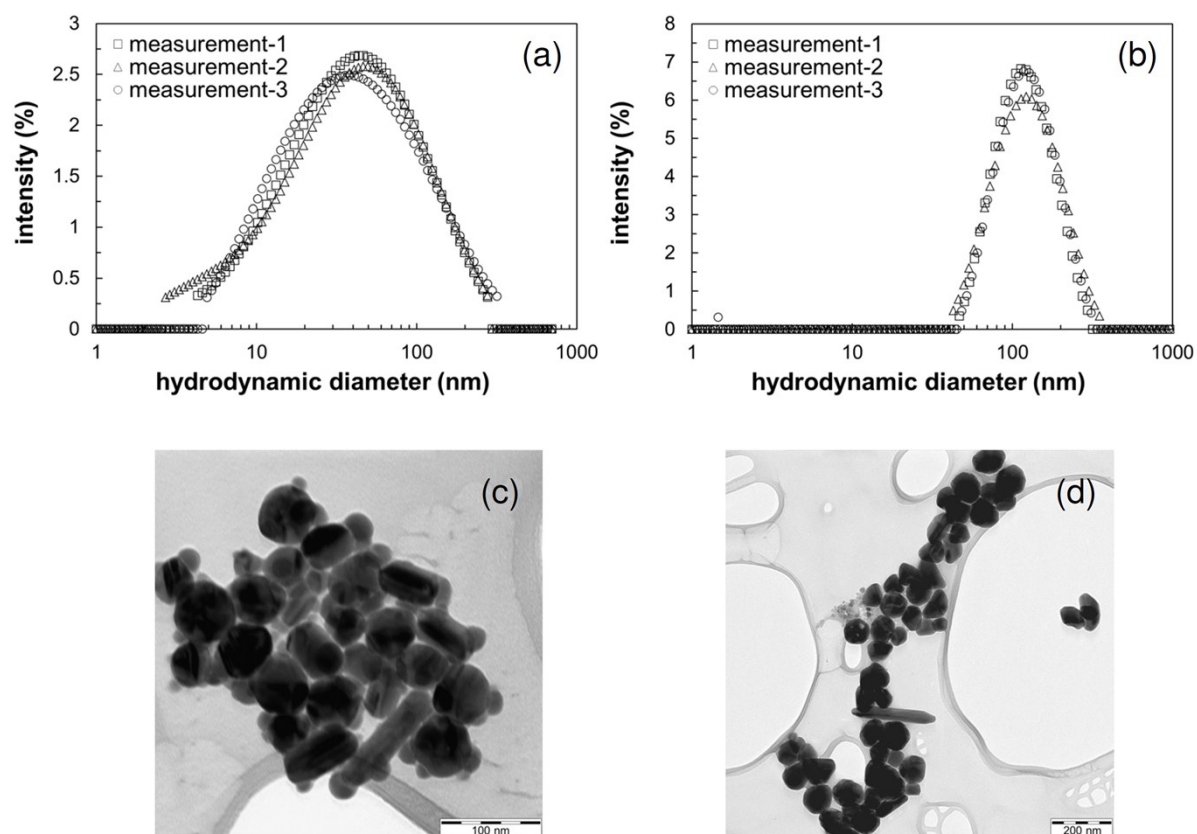

**Figure S1.** Particle size distribution of 30 nm (a) and 100 nm (b) Ag NP determined by DLS. TEM images of 30 nm (c) and 100 nm (d) Ag NP. The percentage of rod-like and triangle particles was 20% for 30 nm Ag NP and 7% for 100 nm Ag NP.

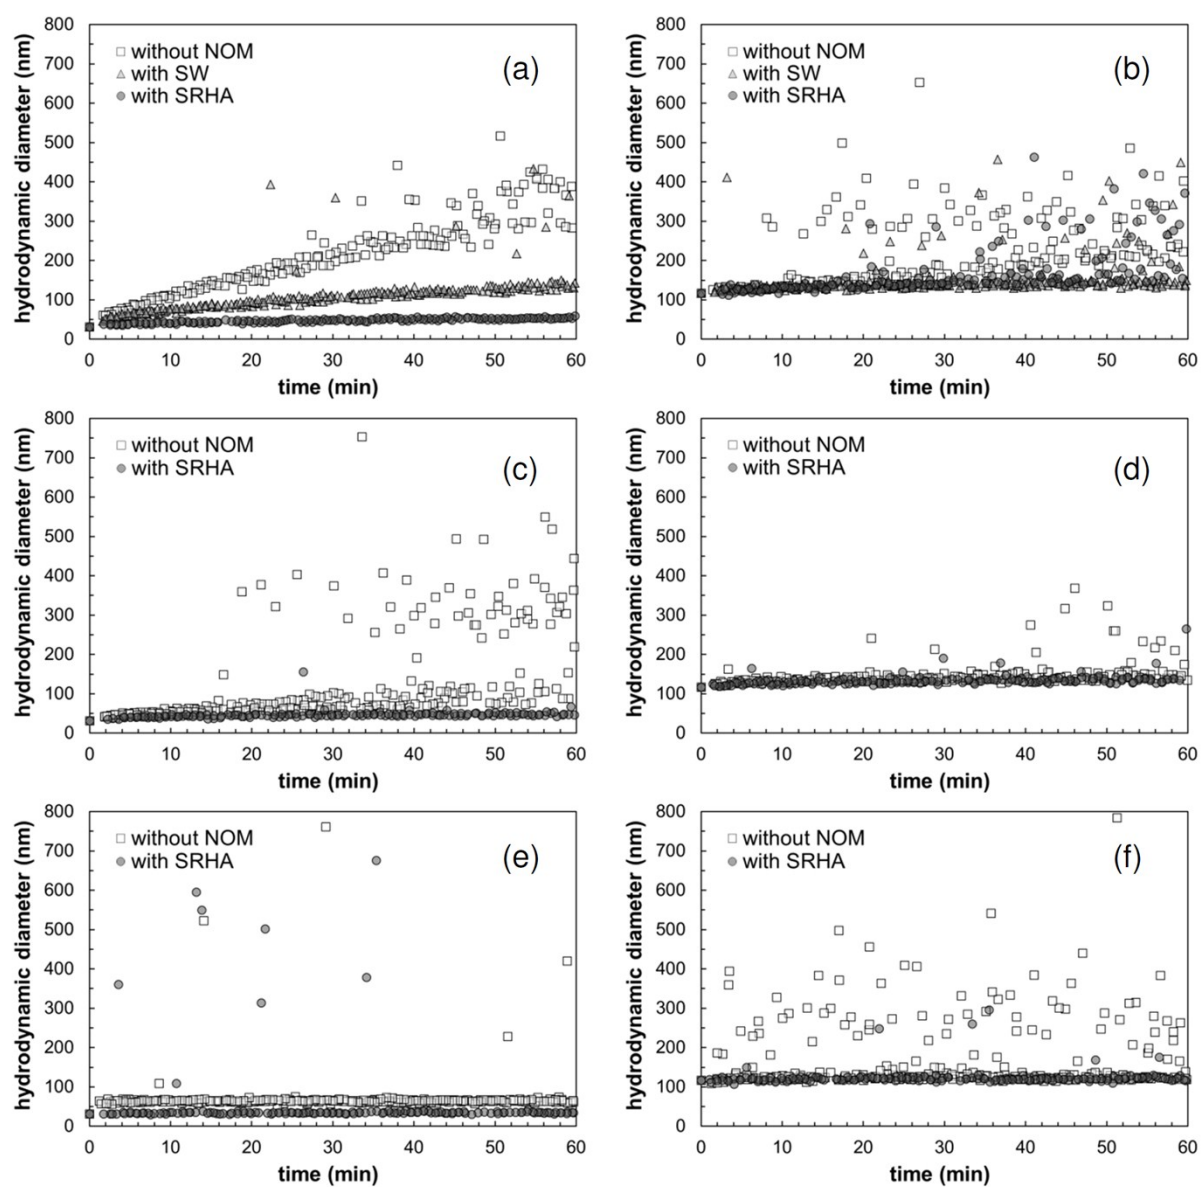

**Figure S2.** Hydrodynamic diameter of 30 nm (a), (c), (e) and 100 nm (b), (d), (f) Ag NP in ASTM (a), (b), SAM-5S (c), (d), and R2A (e), (f) medium for first 60 min as a function of exposure time. Hydrodynamic diameters are given for two replicate experiments.

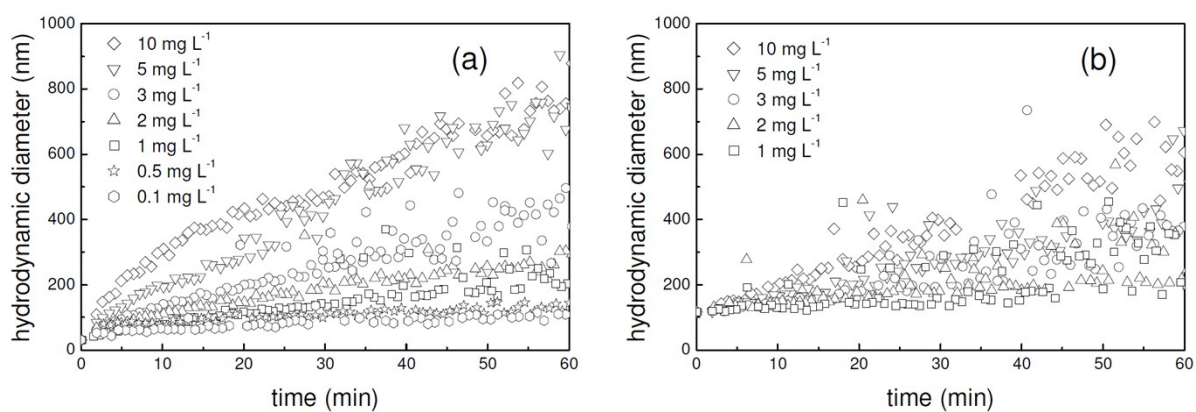

**Figure S3.** Hydrodynamic diameter of 30 nm (a) and 100 nm (b) Ag NP at different particle concentrations in ASTM medium as a function of time.

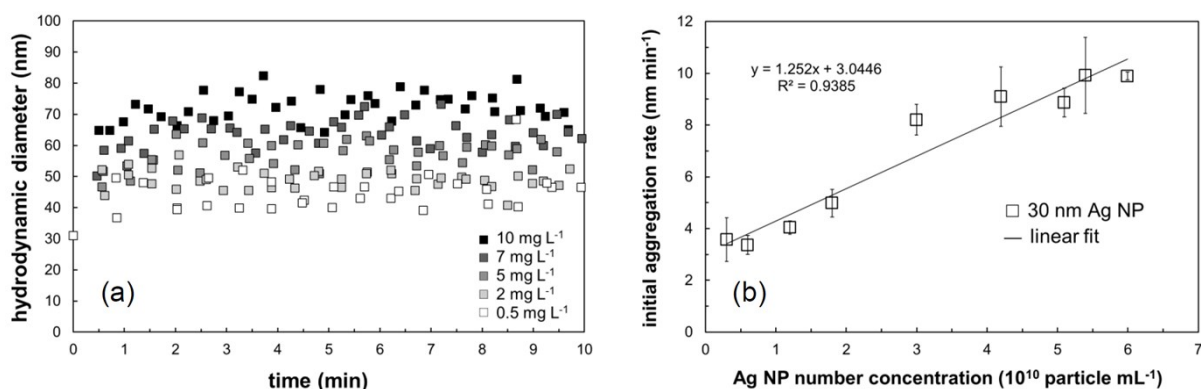

**Figure S4.** Hydrodynamic diameter of 30 nm Ag NP in Mg<sup>2+</sup> free R2A medium at different particle concentration as a function of time (a). Mean initial aggregation rate of 30 nm Ag NP in Mg<sup>2+</sup> free R2A medium as a function of particle number concentration (b). Hydrodynamic diameters and initial aggregation rates are given for two replicates. The error bars represent minimal and maximal values of replicates.

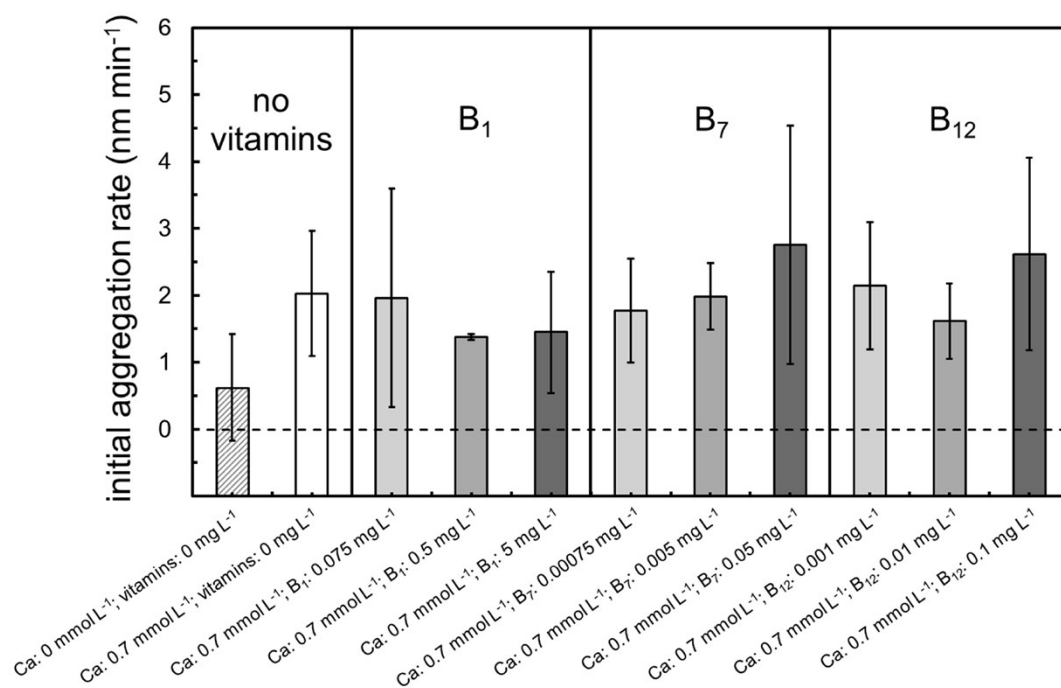

**Figure S5.** Mean initial aggregation rates of 30 nm Ag NP in modified ASTM medium in the absence and presence of  $\text{Ca}^{2+}$  ( $0.7 \text{ mmol L}^{-1}$ ) as well as in the absence and presence of vitamins ( $\text{B}_1$ ,  $\text{B}_7$  and  $\text{B}_{12}$ ) at different concentrations. The lowest concentrations of vitamins are typical concentrations used in ASTM medium. The modified ASTM medium did not contain  $\text{MgSO}_4$ . In modified ASTM medium  $\text{Ca}^{2+}$  was added as a sulfate. The horizontal dashed line shows the initial aggregation rate when no aggregation occurs. The error bars represent the standard deviations from three replicates.

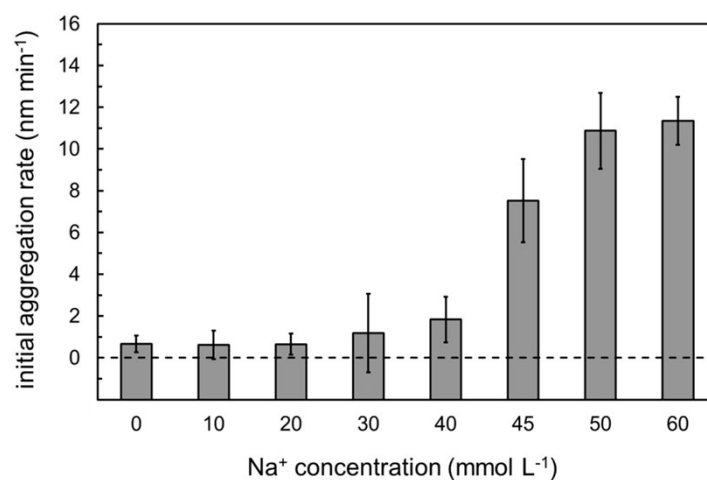

**Figure S6.** Mean initial aggregation rates of 30 nm Ag NP in deionized water in the presence of  $0.03 \text{ mmol L}^{-1}$   $\text{Ca}^{2+}$  and at different  $\text{Na}^+$  concentrations. The horizontal dashed line shows the initial aggregation rate when no aggregation occurs. The error bars represent the standard deviations from three replicates.

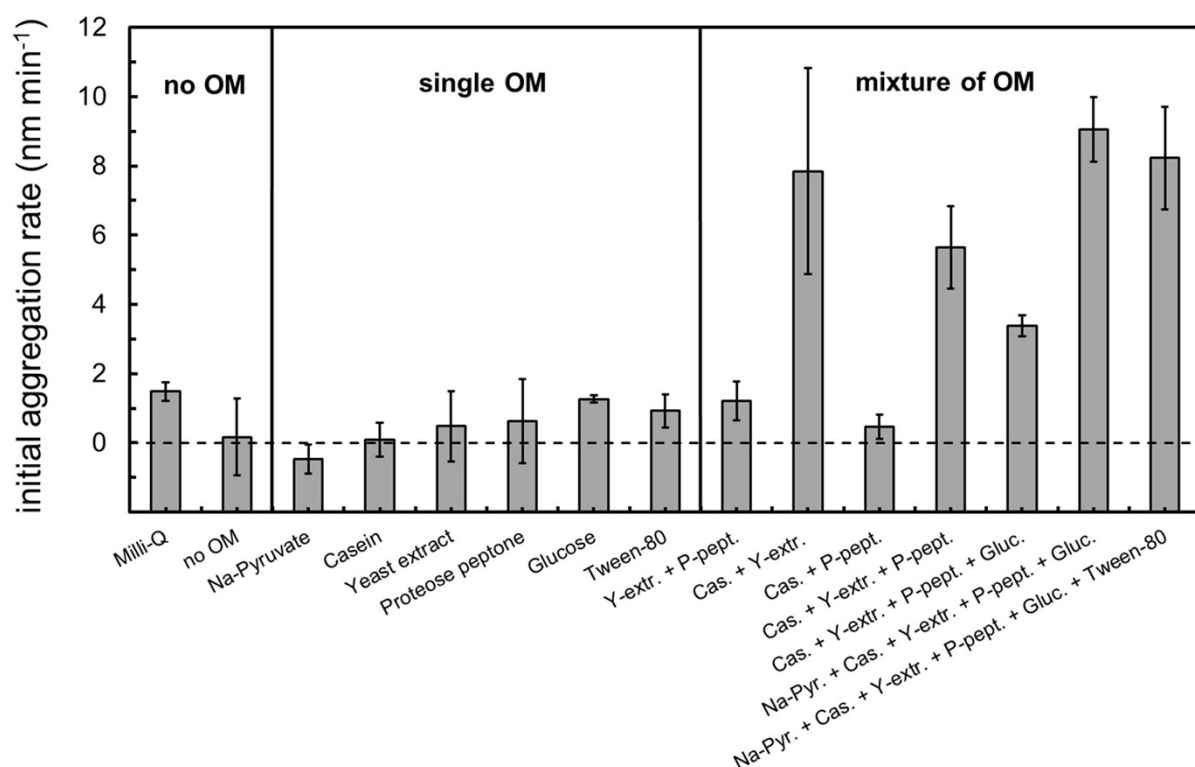

**Figure S7.** Mean initial aggregation rates of 30 nm Ag NP in deionized water and in Mg<sup>2+</sup>-free R2A medium in absence and presence of individual organic constituents of R2A and their mixtures. The horizontal dashed line shows the initial aggregation rate when no aggregation occurs. The error bars represent the standard deviations from three replicates. In the Figure following abbreviations are used: OM: organic matter, Y-Extr.: yeast extract, P-pept.: proteose peptone, Cas.: casein, Gluc.: glucose, Na-Pyr.: Na-Pyruvate.
